# Supplementary material for: Sleep Estimation from Low Frequency Smartphone Sensors via Bayesian Hidden Markov Model
Source: Research Square preprint supplement (doi:10.21203/rs.3.rs-7217304/v1), 2025-08-06
Supplement: Supplementary file 1 [file ad091492eefd2f16347037d9.docx]

Sleep Estimation from Low Frequency Smartphone Sensors via Bayesian Hidden Markov Model

Andrew Jin Soo Byun1, Yufan Li2, Sam Cong1, Alex Dhima1, Shiwei Wang1, Matthew Flathers1, John B. Torous1

1Division of Digital Psychiatry, Beth Israel Deaconess Medical Center, Harvard Medical School, Boston, MA, USA; 2Department of Statistics, Harvard University, Cambridge, MA, USA

*Andrew Jin Soo Byun: 0000-0003-2062-7647 (jbyun1@bidmc.harvard.edu)

Yufan Li: 0000-0001-5412-3397

Sam Cong: 0009-0008-0227-372X

Alex Dhima: 0009-0006-3228-5655

Shiwei Wang: 0009-0001-6257-0397

Matthew Flathers: 0009-0004-3351-0688

John Torous: 0000-0002-5362-7937 (jtorous@bidmc.harvard.edu)

**SUPPLEMENTARY MATERIALS**

| Demographic Variable | All Sites  (n=516) | Digital Clinic  (n=158) | Social Media  (n=315) | Otsuka  (n=17) | App Recommendation  (n=26) |
| --- | --- | --- | --- | --- | --- |
| **Age** | Mean = 28.5  (std = 12.80) | Mean = 39.3  (std = 14.19) | Mean = 21.4  (std = 1.96) | Mean = 46.3  (std = 18.36) | Mean = 37.8  (std=13.84) |
| **Gender** | | | | | |
| Male | 21.90% (n=113) | 28.48% (n=45) | 19.37% (n=61) | 17.65% (n=3) | 15.38% (n=4) |
| Female | 69.77% (n=360) | 67.72% (n=107) | 70.79% (n=223) | 82.35% (n=14) | 61.54% (n=16) |
| Other | 5.04% (n=26) | 2.53% (n=4) | 6.03% (n=19) | 0% (n=0) | 11.54% (n=3) |
| Missing | 3.29% (n=17) | 1.27% (n=2) | 3.81% (n=12) | 0% (n=0) | 11.54% (n=3) |
| **Race** | | | | | |
| White/Caucasian | 62.02% (n=320) | 68.35% (n=108) | 56.19% (n=177) | 88.24% (n=15) | 76.92% (n=20) |
| Black/African-American | 5.62% (n=29)) | 8.86% (n=14) | 3.81% (n=12) | 11.76% (n=2) | 3.85% (n=1) |
| Asian | 16.09% (n=83) | 10.13% (n=16) | 21.27% (n=67) | 0% (n=0) | 0% (n=0) |
| Multiracial or Other | 7.17% (n=37) | 7.59% (n=12) | 7.30% (n=23) | 0% (n=0) | 7.69% (n=2) |
| Hispanic | 5.81% (n=30) | 3.80% (n=6) | 7.62% (n=24) | 0% (n=0) | 0% (n=0) |
| Missing | 3.29% (n=17) | 1.27% (n=2) | 3.81% (n=12) | 0% (n=0) | 11.54% (n=3) |
| **Education** | | | | | |
| Some high school or less | 0% (n=0) | 0% (n=0) | 0% (n=0) | N/A | 0% (n=0) |
| High school/some college or less | 56.59% (n=292) | 79.11% (n=125) | 80.95% (n=255) | N/A | 23.08% (n=6) |
| University or postgraduate degree | 38.82% (n=190) | 19.62% (n=31) | 15.24% (n=48) | N/A | 65.38% (n=17) |
| Missing | 6.59% (n=34) | 1.27% (n=2) | 3.81% (n=12) | N/A | 11.54% (n=3) |

**Table 1. Demographics by Study Type**
